# Supplementary material
Source: Springer Nature journal article supplement (https://www.springermedizin.de/resource/supplementary/12933_2010_328_MOESM2_ESM.pdf/9538158)

**Panel A**

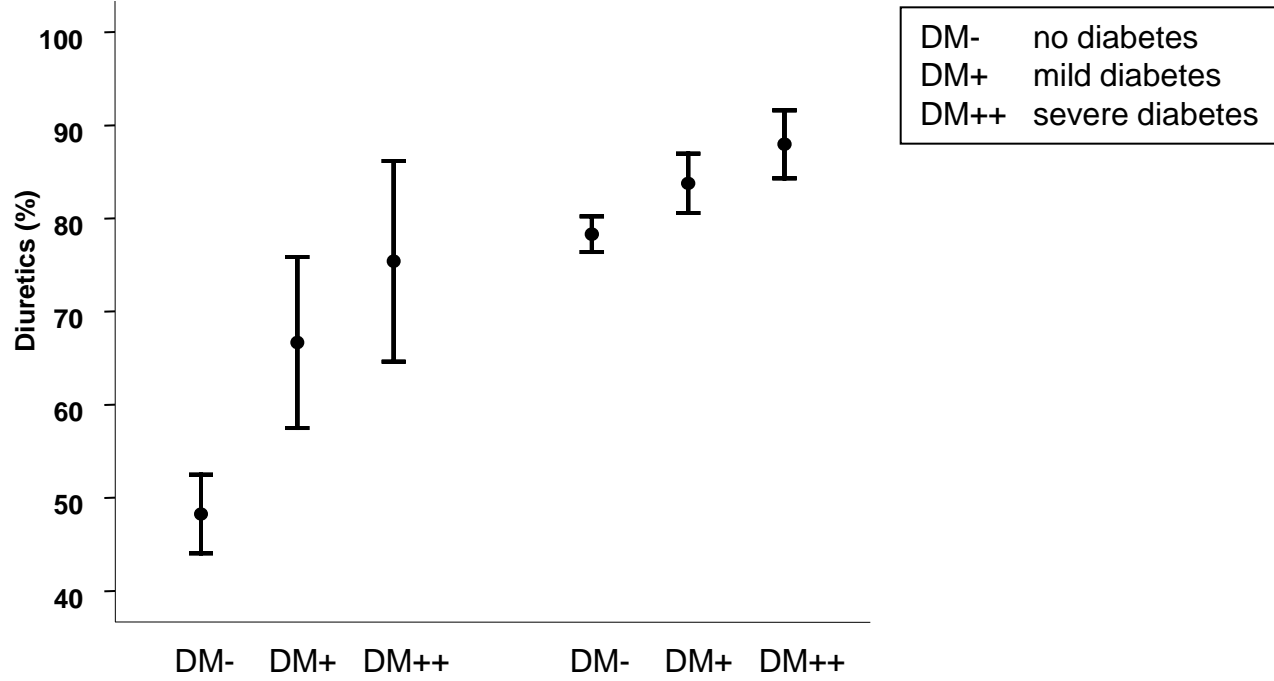

**Panel B**

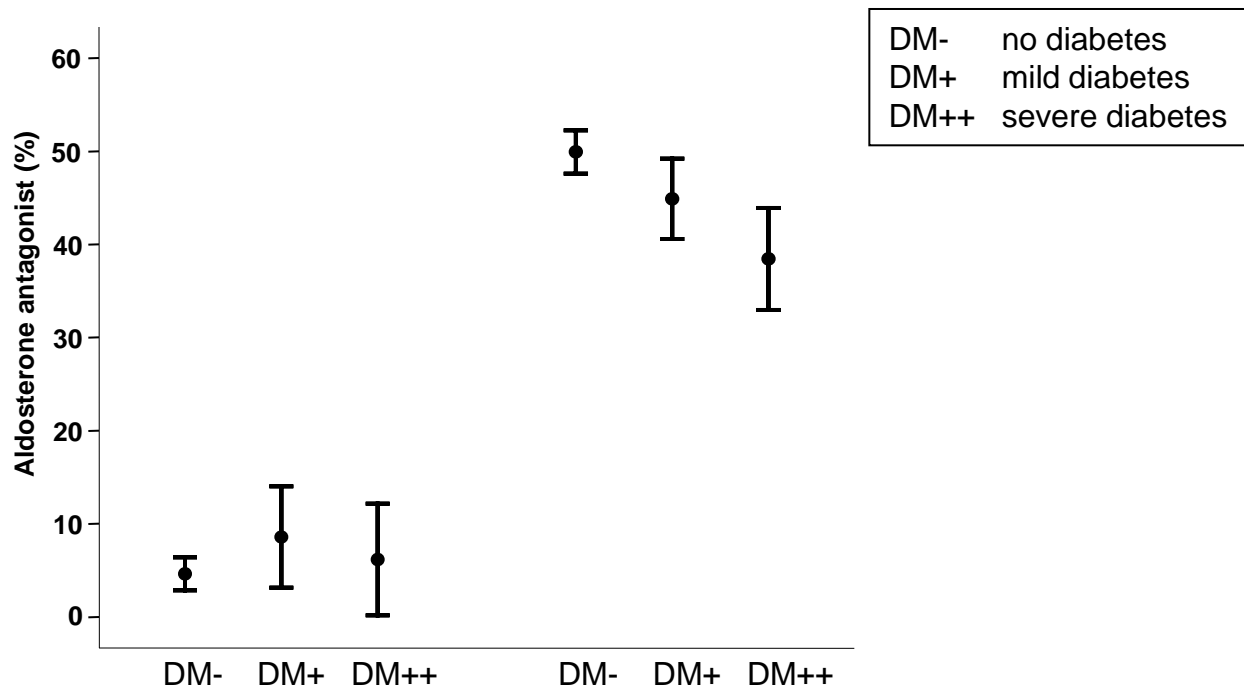

Supplement: MOESM2 [file 9538158]
